# Supplementary material for: Measuring site fidelity and spatial segregation within animal societies
Source: PubMed Central journal article supplement (PMC5586202; doi:10.1111/2041-210x.12751), 2017-03-20
Supplement: MEE3-8-965-s001.pdf [file MEE3-8-965-s001.pdf]

# Measuring site fidelity and spatial segregation within animal societies: Supporting information

Thomas O. Richardson, Luca Giuggioli, Nigel R. Franks, Ana B. Sendova-Franks

## Tracking the brood

Although the brood may appear stationary, the workers do move them, so it is necessary to occasionally update the brood item locations occasionally to compensate for their slow movement. To do so, in the first photograph, and every 50 photographs (i.e. every 500 minutes) thereafter, a census of the brood was taken. This involved manually recording of the location and developmental stage of each item (Fig. S1). An example of the spatial distribution of the brood over time is shown in Figure S2, and the censuses demographics are summarized in (Table. S1)

In order to obtain the number of brood items in each site  $s$  at each time-point  $t$ , the ant trajectories were split according to the nearest brood census. Thus, trajectory coordinates occurring in the range  $1 < t < 25$  were assigned to the first census (at  $t=1$ ), and those occurring in the range  $26 < t < 75$  were assigned to the second census (at  $t=51$ ), and so on. Hence the brood locations were never more than 25 photographs out of date.

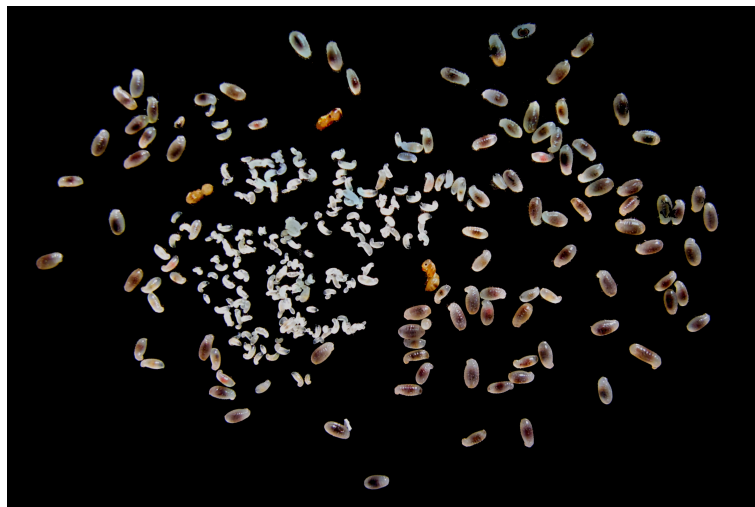

Figure S1: Example photograph of the brood pile. The small white items in central positions are eggs and small larvae. The grey peripheral items are large larvae. The orange items are pupae.

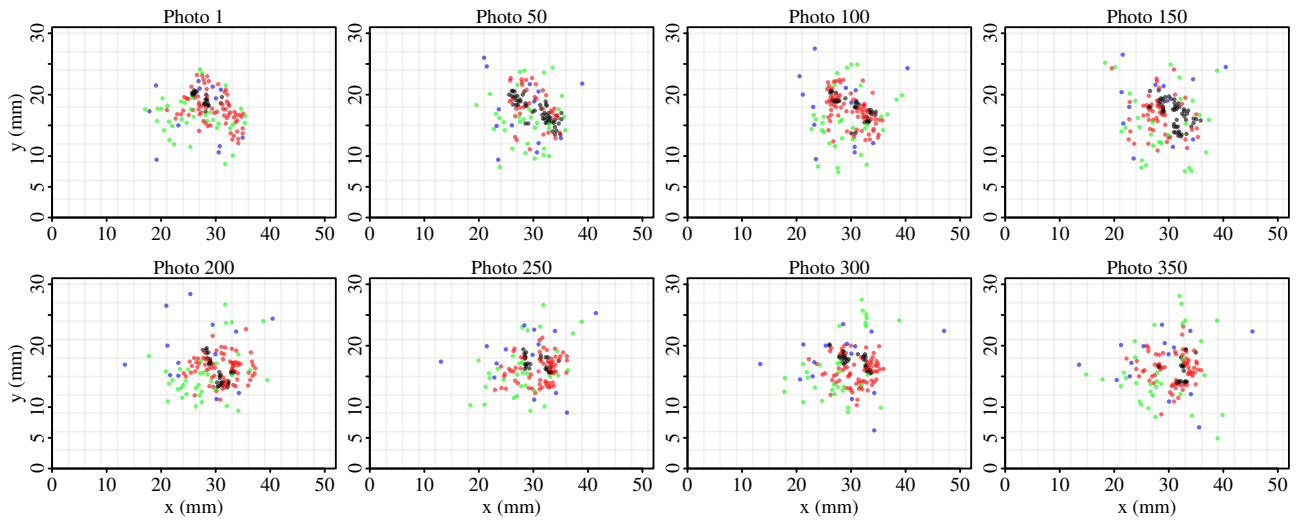

Figure S2: Censusing the brood. Each panels shows a single brood census from colony 6. Black, red, green and blue points respectively represent eggs, small larvae, large larvae & pupae.

Table S1: Colony-level summary of brood and adult demographics. Brood numbers represent means calculated across the brood censuses, rounded to the nearest whole number. Brood censuses were carried out every 50 photos (i.e. approximately every 8h). All colonies were queenright.

| Colony | N eggs | N small larvae | N large larvae | N pupae | N adults |
|--------|--------|----------------|----------------|---------|----------|
| 1      | 29     | 38             | 40             | 27      | 71       |
| 2      | 8      | 5              | 8              | 22      | 59       |
| 3      | 30     | 66             | 33             | 5       | 78       |
| 4      | 53     | 34             | 56             | 0       | 118      |
| 5      | 64     | 67             | 66             | 0       | 96       |
| 6      | 36     | 59             | 32             | 13      | 95       |
| 7      | 110    | 69             | 72             | 39      | 88       |
| 8      | 26     | 27             | 28             | 21      | 93       |
| 9      | 6      | 0              | 0              | 0       | 134      |
| 10     | 7      | 0              | 0              | 0       | 90       |
| 11     | 0      | 0              | 0              | 0       | 61       |
| 12     | 12     | 0              | 0              | 0       | 67       |
| 13     | 6      | 0              | 0              | 0       | 79       |
| 14     | 3      | 0              | 0              | 0       | 47       |
| 15     | 4      | 0              | 0              | 0       | 76       |
| 16     | 31     | 24             | 29             | 1       | 67       |
| 17     | 26     | 39             | 42             | 1       | 60       |
| 18     | 42     | 15             | 29             | 0       | 90       |
| 19     | 73     | 17             | 23             | 26      | 90       |
| 20     | 16     | 8              | 7              | 15      | 115      |
| 21     | 12     | 14             | 39             | 2       | 96       |
| 22     | 58     | 25             | 37             | 3       | 80       |
| 23     | 13     | 20             | 13             | 1       | 64       |

## 15 Reductive versus site-centric approaches to site fidelity

16 In the ‘traditional’ reductive approach to detecting site fidelity, each trajectory is reduced to a single summary  
17 statistic, such as the area that it fills. If the observed trajectory fills a significantly smaller area than do synthetic  
18 trajectories produced by a null model, the individual is then classified as exhibiting site fidelity, whereas if the  
19 observed area is larger than the sythetic trajectories, then the individual is classified as exhibiting ‘roaming’ be-  
20 haviour (Munger, 1984; Danielson and Swihart, 1987; Sendova-Franks and Franks, 1995; Jandt and Dornhaus,  
21 2009).

22 The reductive approach rests upon a comparison between the area covered by the original and synthetic  
23 trajectories. In this section we show that because the reductive approach focuses on the scale of the range  
24 used by an individual, it is not a particularly good choice for identifying an individual that is attracted to one or  
25 several sites, but but whose trajectory nevertheless still covers a similar area to that covered by a set of synthetic  
26 trajectories that by design exhibit no spatial biases. Other methods are needed to identify site fidelity at smaller  
27 spatial scales.

28 We here present a simple demonstration of this. First, we define a regular grid of sites towards which an  
29 agent will be attracted. Using this array, we then simulate a biased random walk in which the bias towards a  
30 given attractive site is dependent upon the distance from the site (Fig. S3a). This model is also known as the  
31 Ornstein-Uhlenbeck process (Preisler et al., 2013). We then define a square grid (with arbitrary dimensions),  
32 and count the number of sites (i.e. grid squares) that the agent visits. Here,  $N_i=1398$ . Next, an unbiased version  
33 of the original trajectory is generated using the Random Walk null model (Fig. S3b). The RW null model is  
34 repeated 1000 times, and the number of sites that each synthetic RW trajectory covers is recorded. Finally, we  
35 test the null hypothesis that the number of sites that the agent was observed to visit belongs to the distribution  
36 of 1000  $N_i$  values from the synthetic trajectories. In the present case, this null hypothesis cannot be rejected  
37 ( $p=n.s.$ ). The failure of the reductive approach to reject the null hypothesis leads to the erroneous conclusion  
38 that the original trajectory exhibits no spatial bias.

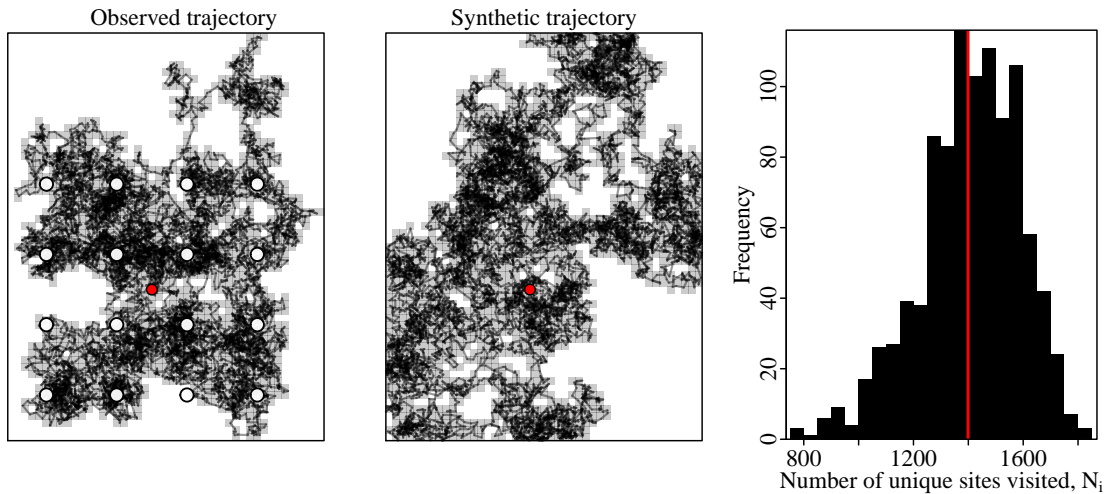

Figure S3: The reductive approach is not an optimal choice for identifying attractive sites. (a) Trajectory of an agent  $i$ , that is attracted to multiple locations (white points). Grey background shading indicates the area (number of sites) covered by the trajectory,  $N_i$ . The red dot indicates the starting location. (b) Synthetic version of the original trajectory, produced by the Random Walk null model. Notice that the trajectory is no longer biased towards any locations. (c) Comparison between the number of sites visited by the original trajectory (red vertical line), and an ensemble of 1000 synthetic trajectories produced by the null model (black bars). Notice that the number of sites visited by the original trajectory is indistinguishable from the number visited by the synthetic trajectories, hence the reductive approach fails to detect the expression of site fidelity.

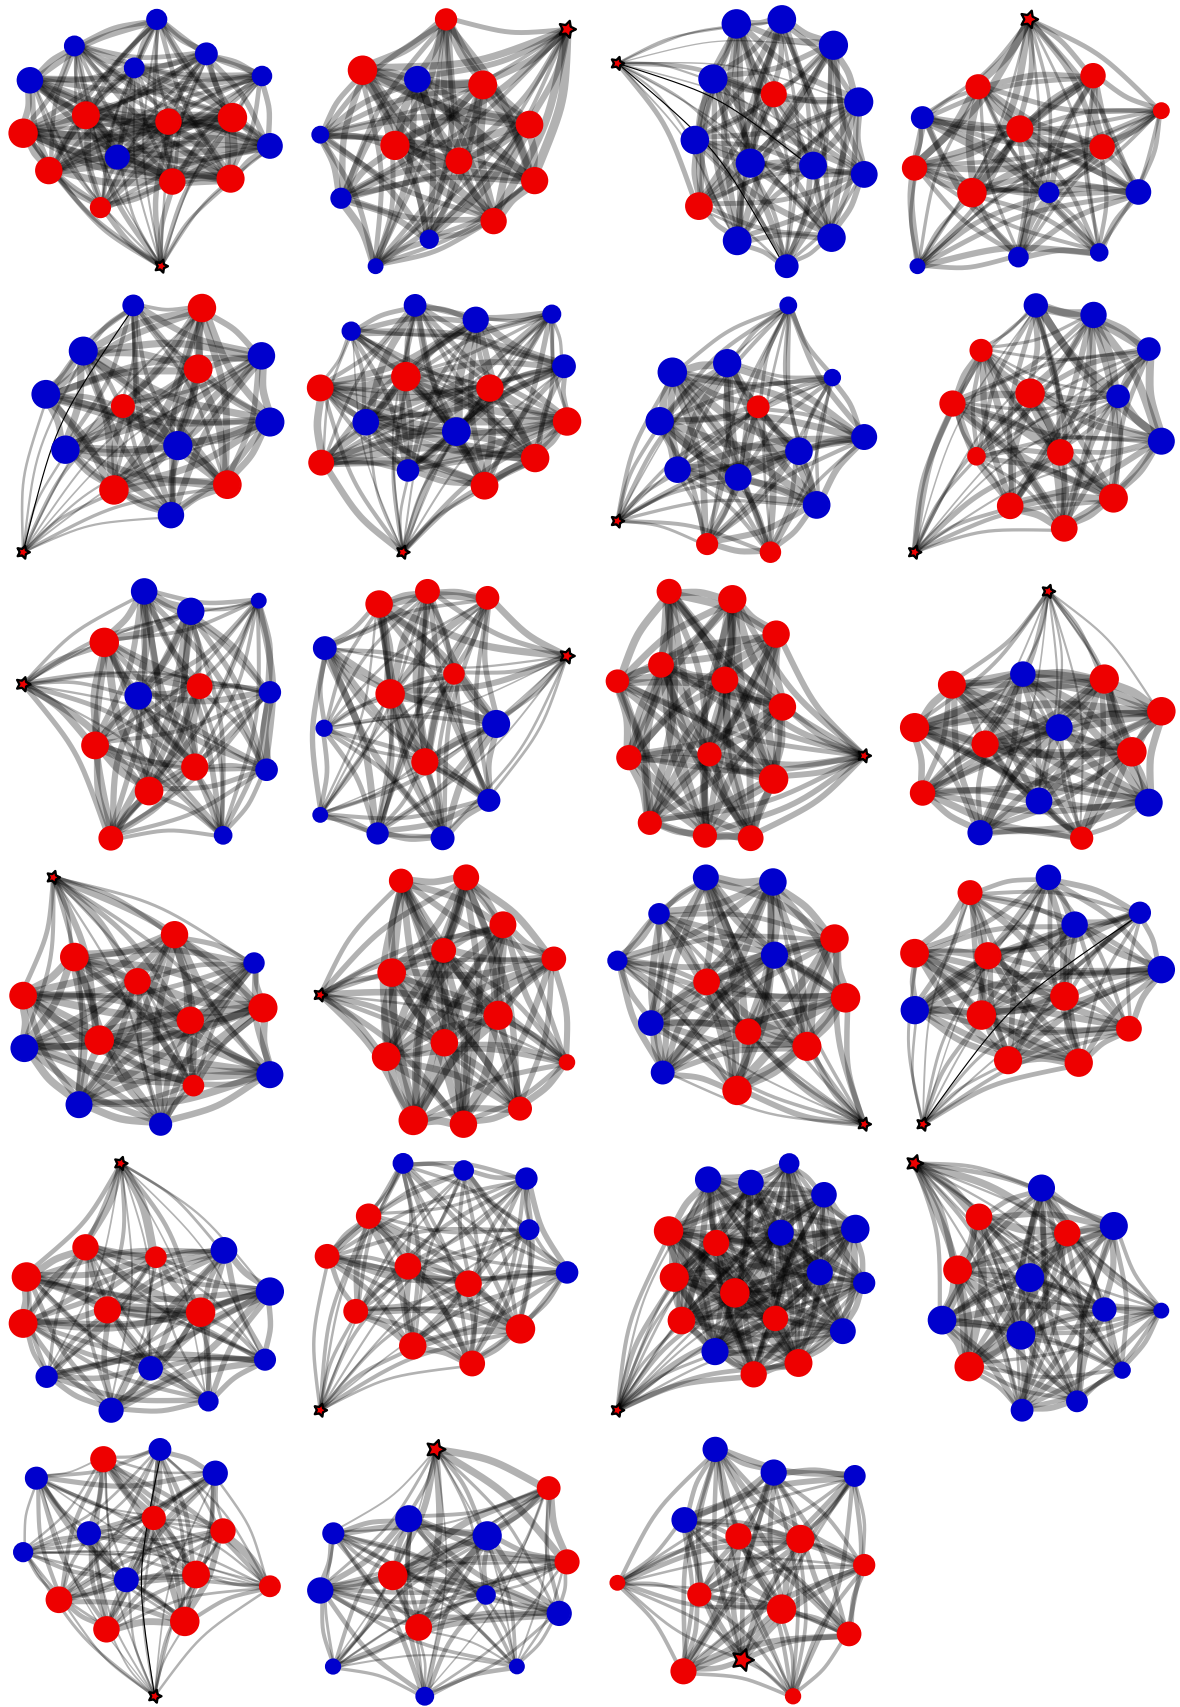

Figure S4: Network representation of the spatial (dis)similarities for all 23 colonies. Edge widths are proportional to the spatial overlap,  $V_{i,j}$ . The queen is indicated by the star. Vertices are coloured according to their community membership. Vertex size is proportional to the weighted degree. Red nodes - the queen community, labelled 'nurses'. Blue nodes - the 'other' community.

## 39 **References**

- 40 Danielson, B. J. and R. K. Swihart (1987). Home range dynamics and activity patterns of *Microtus ochrogaster*  
41 and *Synaptomys cooperi* in syntopy. *Journal of Mammalogy* 68(1), 160–165.
- 42 Jandt, J. M. and A. Dornhaus (2009). Spatial organization and division of labour in the bumblebee *Bombus*  
43 *impatiens*. *Animal Behaviour* 77(3), 641–651.
- 44 Munger, J. C. (1984). Home ranges of horned lizards (*Phrynosoma*): circumscribed and exclusive? *Oecolo-*  
45 *gia* 62(3), 351–360.
- 46 Preisler, H. K., A. A. Ager, and M. J. Wisdom (2013). Analyzing animal movement patterns using potential  
47 functions. *Ecosphere* 4(3), 1–13.
- 48 Sendova-Franks, A. and N. Franks (1995). Spatial relationships within nests of the ant *Leptothorax unifasciatus*  
49 (*Latr.*) and their implications for the division of labour. *Animal Behaviour* 50(1), 121–136.
